# Supplementary material
Source: Royal Society of Chemistry journal article supplement (doi:10.1039/d6tc00778c)
Supplement: d6tc00778c1.pdf [file d6tc00778c1.pdf]

Supporting Information

Interface effect of MOF-derived Pr<sub>6</sub>O<sub>11</sub>/SnO<sub>2</sub>  
composite material enhances oxygen vacancies for  
achieving highly sensitive detection of *n*-butanol gas

*Leilei Zhang, Fubo Gu\*, Zhihua Wang\**

State Key Laboratory of Chemical Resources Engineering, Beijing University of Chemical  
Technology, Beijing 100029, China

## Experiment reagent

$\text{SnCl}_2 \cdot 2\text{H}_2\text{O}$  (98%) and 2-methylimidazole ( $\text{C}_4\text{H}_6\text{N}_2$ ,  $\geq 98\%$ ) were purchased from Shanghai Aladdin Bio-Chem Technology Co., Ltd.;  $\text{Pr}(\text{NO}_3)_3 \cdot 6\text{H}_2\text{O}$  (99%) was obtained from Tianjin Kemaite Chemical Technology Co., Ltd.; Benzene-1,3,5-tricarboxylic acid ( $\text{C}_9\text{H}_6\text{O}_6$ , 99%) was acquired from Beijing Innochem Technology Co., Ltd.; Ethanol ( $\text{C}_2\text{H}_5\text{OH}$ ,  $\geq 99.7\%$ ) and methanol ( $\text{CH}_3\text{OH}$ ,  $\geq 99.5\%$ ) were supplied by Tianjin Fuyu Fine Chemical Co., Ltd. All chemical reagents were of analytical grade and were used directly in the experiments.

## Testing process of gas sensors

The gas sensing performance of the material was evaluated using a CGS-4TPs (Beijing ELITE TECH Company) gas sensing analysis system. The procedure was as follows: after stabilization of the operating temperature, the chamber cover was closed. A micro-injector was used to withdraw a precise volume of *n*-butanol and inject it into the evaporation dish inside the chamber from the right side. And during selective testing, all liquids are injected from the right injection port. The evaporation temperature was maintained at 180 °C. Upon injection, *n*-butanol rapidly volatilized and uniformly filled the chamber, where it interacted with the sensor surface. For n-type semiconductors, when detecting reducing gases, the response is expressed as  $S = R_a/R_g$ ; when detecting oxidizing gases, the response is expressed as  $S = R_g/R_a$ , where  $R_g$  denotes the resistance in the target gas and  $R_a$  represents the resistance in air. The response time is defined as the time required for the resistance of the sensor to change by 90% after being exposed to the target gas, while the recovery time refers to the time needed for the resistance to recover to 90% of its baseline value after opening the chamber cover. The amount of injected *n*-butanol was calculated according to eqn (S1).

$$V_{\text{liquid}} = \frac{V_0 C_g M}{22.4 \rho w} \times 10^{-1} \dots\dots\dots(S1)$$

In eqn (S1),  $V_{\text{liquid}}$  ( $\mu\text{L}$ ) denotes the volume of the injected liquid;  $C_g$  is the target concentration;  $V_0$  represents the volume of the detection chamber, which is 1.8 L;  $M$  (g/mol) is the molecular weight of the target gas;  $\rho$  (g/mL) refers to the density of the target liquid; and  $w$  (wt%) indicates the mass fraction of the target liquid.

Unlike liquid injections, when  $\text{NO}_2$  is injected from the left injection port, the injection volume is calculated according to eqn (S2).

$$V_{\text{gas}} = V_0 \times \frac{C_g}{C_i} \dots\dots\dots(S2)$$

In eqn (S2),  $V_{\text{gas}}$  ( $\mu\text{L}$ ) denotes the volume of the injected gas and  $C_i$  shows the initial concentration.

When testing the moisture resistance of the materials, the humidity control method is as follows: The steps before injecting the target gas solution are as mentioned above. And then environmental humidity testing is commonly employed at low humidity levels. When testing the performance under high humidity conditions, a humidification device is usually used to assist the testing. The air produced by the air generator will carry water vapor obtained through the evaporation of water into the reaction chamber, thereby increasing the humidity of the test. After the humidity has stabilized, the target gas solution is injected and the test is conducted.

**Thermogravimetric of the Sn-MOF and Pr-MOF**

From Fig. S1a, it can be found that calcination of Sn-MOF is mainly divided into two stages. The first stage is the loss of  $\text{H}_2\text{O}$  molecules, with a weight loss of approximately 15.8%; the second stage is the thermal decomposition of the organic framework, with a weight loss of up to 34.8%; it

reaches stability at a temperature of 474 °C, indicating that 500 °C calcination of Sn-MOF can completely convert to SnO<sub>2</sub>. As shown in Fig. S1b, calcination of Pr-MOF is mainly divided into two stages. The first stage is the loss of H<sub>2</sub>O molecules, with a weight loss of approximately 22.1%; the second stage is the thermal decomposition of the organic framework, with a weight loss of up to 39.3%; the curve flattens at 498 °C, indicating that 500 °C calcination of Pr-MOF can completely convert to Pr<sub>6</sub>O<sub>11</sub>.

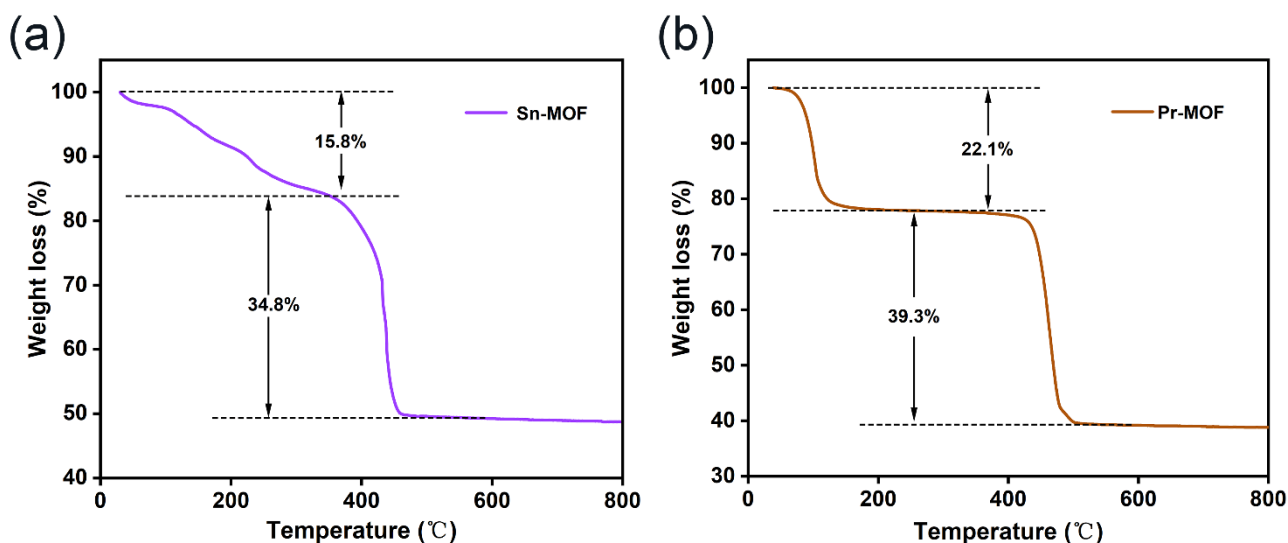

**Fig. S1** Thermogravimetric diagram of (a) Sn-MOF and (b) Pr-MOF.

### Analysis of crystal structure parameters by XRD

The lattice parameters of SnO<sub>2</sub> were calculated using eqn (S3). Given that SnO<sub>2</sub> possesses a tetragonal crystal structure, the unit cell parameters satisfy  $a=b$ . The grain size  $D$  was calculated using the eqn (S4), while  $\varepsilon$  was computed according to eqn (S5). The results are summarized in Table S1.

$$\frac{1}{d^2} = \frac{h^2 + k^2}{a^2} + \frac{l^2}{c^2} \dots\dots\dots(S3)$$

$$D = \frac{\sigma\lambda}{\beta\cos\theta} \dots\dots\dots(S4)$$

$$\varepsilon = \frac{\beta}{4 \tan \theta} \dots \dots \dots (S5)$$

In the equation,  $h$ ,  $k$ , and  $l$  denote the Miller indices of the crystal plane;  $a$ ,  $b$ , and  $c$  represent the lattice parameters;  $d$  is the lattice distance;  $\sigma$  is the Scherrer constant ( $k = 0.89$ );  $\lambda$  is the X-ray wavelength (0.154 nm);  $\beta$  is the full width at half maximum of the diffraction peak; and  $\theta$  is the diffraction angle.

**Table S1.** Crystal structure parameters of SnO<sub>2</sub> and samples of Pr<sub>6</sub>O<sub>11</sub>/SnO<sub>2</sub> at different ratios.

| Sample                                                  | Lattice parameter |         | $d_{(110)}$<br>(nm) | $D$ (Å) | $\varepsilon$ (%) |
|---------------------------------------------------------|-------------------|---------|---------------------|---------|-------------------|
|                                                         | $a=b$ (Å)         | $c$ (Å) |                     |         |                   |
| SnO <sub>2</sub>                                        | 0.4732            | 0.3174  | 0.3349              | 62.61   | 1.87              |
| 3 at% Pr <sub>6</sub> O <sub>11</sub> /SnO <sub>2</sub> | 0.4732            | 0.3174  | 0.3343              | 64.07   | 1.83              |
| 6 at% Pr <sub>6</sub> O <sub>11</sub> /SnO <sub>2</sub> | 0.4736            | 0.3173  | 0.3353              | 65.24   | 1.80              |
| 9 at% Pr <sub>6</sub> O <sub>11</sub> /SnO <sub>2</sub> | 0.4736            | 0.3173  | 0.3349              | 63.38   | 1.84              |

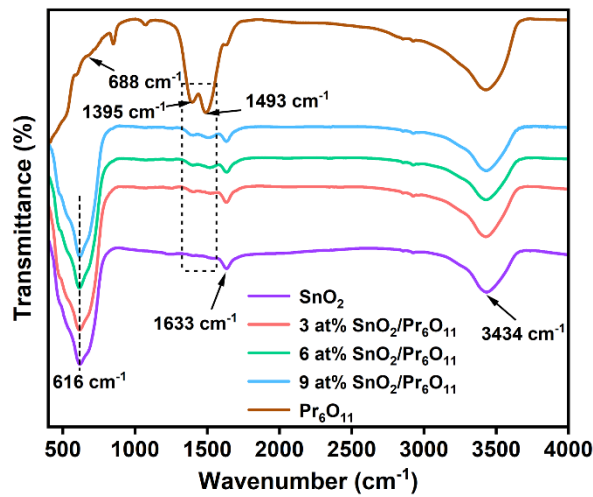

**Fig. S2** FTIR spectra of SnO<sub>2</sub>, Pr<sub>6</sub>O<sub>11</sub>, and Pr<sub>6</sub>O<sub>11</sub>/SnO<sub>2</sub> sensors with different ratios.

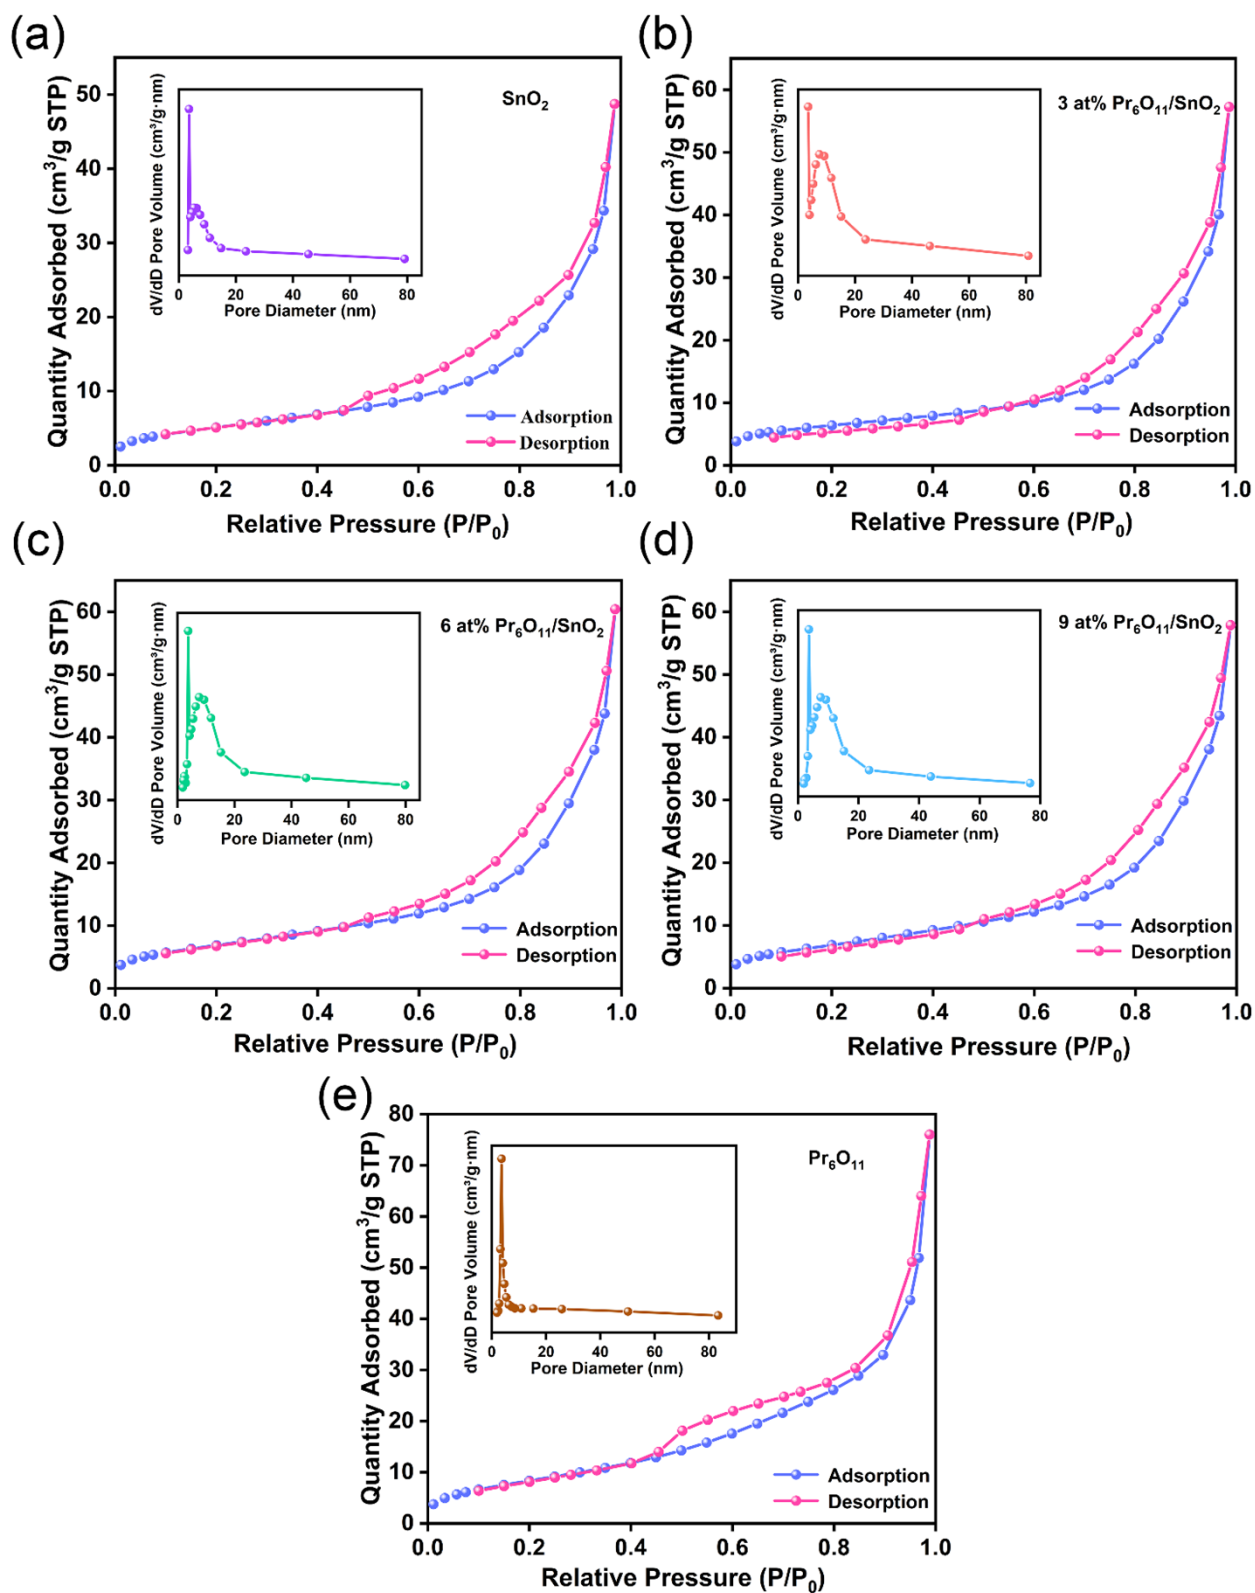

**Fig. S3**  $N_2$  isothermal adsorption-desorption curves and pore size distribution: (a)  $SnO_2$ ; (b) 3 at%  $Pr_6O_{11}/SnO_2$ ; (c) 6 at%  $Pr_6O_{11}/SnO_2$ ; (d) 9 at%  $Pr_6O_{11}/SnO_2$ ; (e)  $Pr_6O_{11}$  (The insets are the pore size distribution of samples).

**Table S2.** Surface area and pore size information of SnO<sub>2</sub>, Pr<sub>6</sub>O<sub>11</sub>, and Pr<sub>6</sub>O<sub>11</sub>/SnO<sub>2</sub> sensors.

| Samples                                                 | Surface area (m <sup>2</sup> /g) | Pore size (nm) |
|---------------------------------------------------------|----------------------------------|----------------|
| SnO <sub>2</sub>                                        | 19.00                            | 11.86          |
| 3 at% Pr <sub>6</sub> O <sub>11</sub> /SnO <sub>2</sub> | 22.54                            | 12.81          |
| 6 at% Pr <sub>6</sub> O <sub>11</sub> /SnO <sub>2</sub> | 25.17                            | 16.10          |
| 9 at% Pr <sub>6</sub> O <sub>11</sub> /SnO <sub>2</sub> | 25.10                            | 14.05          |
| Pr <sub>6</sub> O <sub>11</sub>                         | 32.15                            | 10.66          |

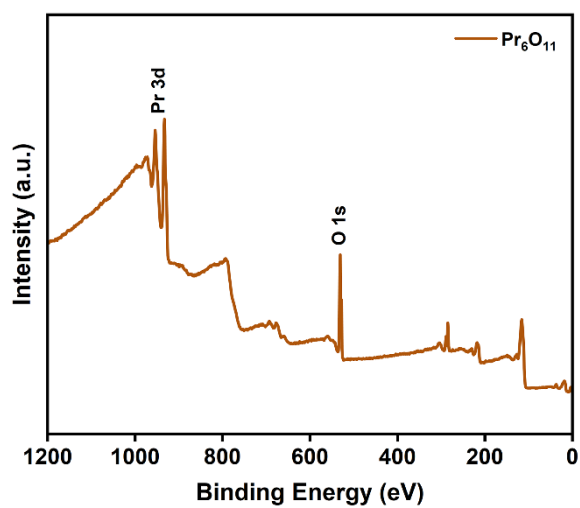

**Fig. S4** The full XPS spectrum of Pr<sub>6</sub>O<sub>11</sub>.

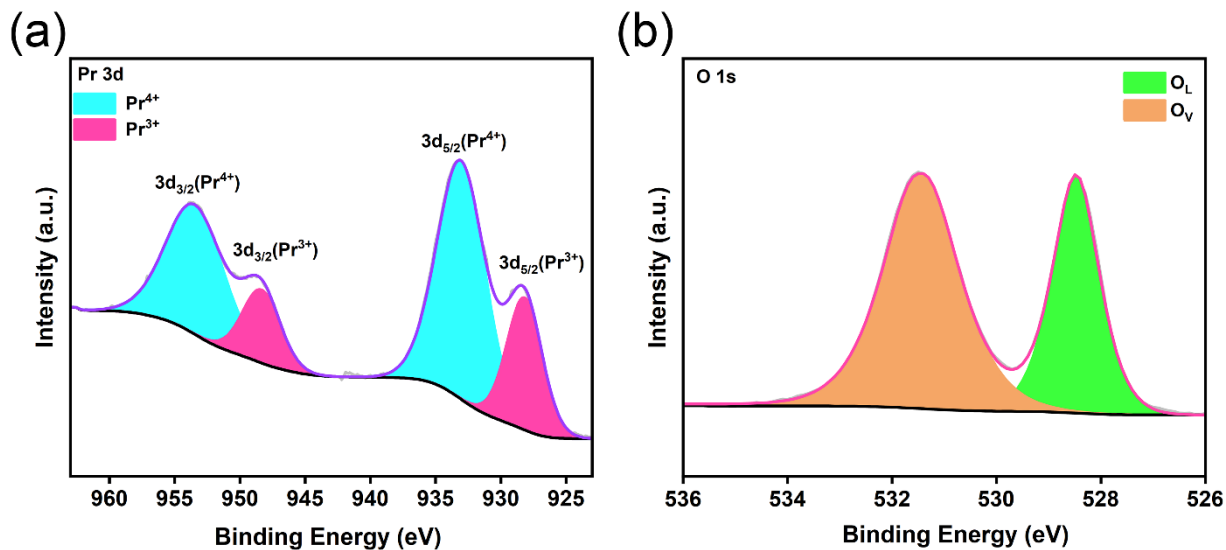

**Fig. S5** XPS spectra of  $\text{Pr}_6\text{O}_{11}$ : (a) Pr 3d; (b) O 1s.

**Table S3.** Atomic percentages of Pr and Sn in  $\text{Pr}_6\text{O}_{11}/\text{SnO}_2$  sensors with different ratios.

| Samples                                       | XRF Pr/Sn (at%) | XPS Pr/Sn (at%) | EDS Pr/Sn (at%) |
|-----------------------------------------------|-----------------|-----------------|-----------------|
| 3 at% $\text{Pr}_6\text{O}_{11}/\text{SnO}_2$ | 3.60            | 7.13            | 7.61            |
| 6 at% $\text{Pr}_6\text{O}_{11}/\text{SnO}_2$ | 6.75            | 13.08           | 10.48           |
| 9 at% $\text{Pr}_6\text{O}_{11}/\text{SnO}_2$ | 10.75           | 17.86           | 12.88           |

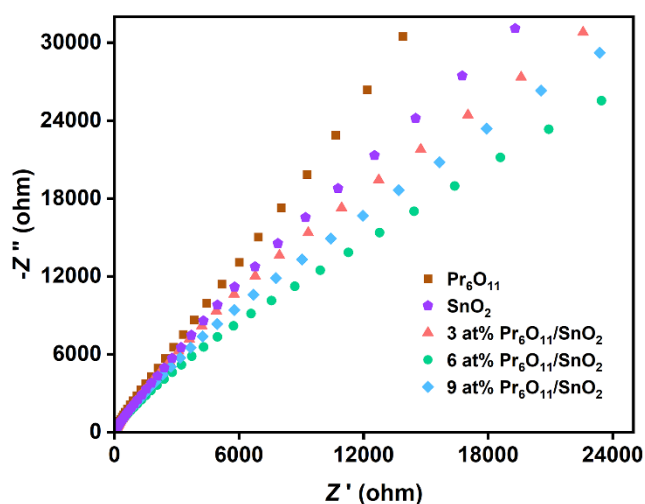

**Fig. S6** Nyquist plots of  $\text{SnO}_2$ ,  $\text{Pr}_6\text{O}_{11}$ , and  $\text{Pr}_6\text{O}_{11}/\text{SnO}_2$  samples in different ratios.

## Band structure calculation of SnO<sub>2</sub> and Pr<sub>6</sub>O<sub>11</sub>

The sign of the slope of the Mott-Schottky curve can indicate the type of semiconductor. The slope of n-type semiconductor is positive, while that of p-type semiconductor is negative. Thus, it can be determined that both SnO<sub>2</sub> and Pr<sub>6</sub>O<sub>11</sub> are n-type semiconductors. As shown in Fig. S7a and S7c, the valence band potential of SnO<sub>2</sub> is 3.33 eV, and that of Pr<sub>6</sub>O<sub>11</sub> is 0.48 eV. According to eqn (2), the valence band potential of the SnO<sub>2</sub> sample relative to the standard hydrogen electrode (NHE) is 3.24 eV; the valence band potential of the Pr<sub>6</sub>O<sub>11</sub> sample relative to the standard hydrogen electrode is 0.39 eV. Fig. S7b and S7d show the Mott-Schottky diagrams of SnO<sub>2</sub> and Pr<sub>6</sub>O<sub>11</sub> at 500, 1000, and 1500 Hz. It can be obtained that the flat band potentials ( $E_{FB}$ ) of SnO<sub>2</sub> and Pr<sub>6</sub>O<sub>11</sub> are -0.20 eV and -1.40 eV, respectively, and the flat band potentials relative to the standard hydrogen electrode are 0 eV and -1.20 eV. The potential of the conduction band is 0.1 eV lower than that of the flat band. Therefore, the conduction band potential of SnO<sub>2</sub> relative to the standard hydrogen electrode is -0.10 eV, and that of Pr<sub>6</sub>O<sub>11</sub> is -1.30 eV. Combining eqn (3) and the calculated  $E_{CB}$  and  $E_{VB}$ , the band gap width of SnO<sub>2</sub> is 3.34 eV, and that of Pr<sub>6</sub>O<sub>11</sub> is 1.69 eV, which is consistent with the UV-vis results.

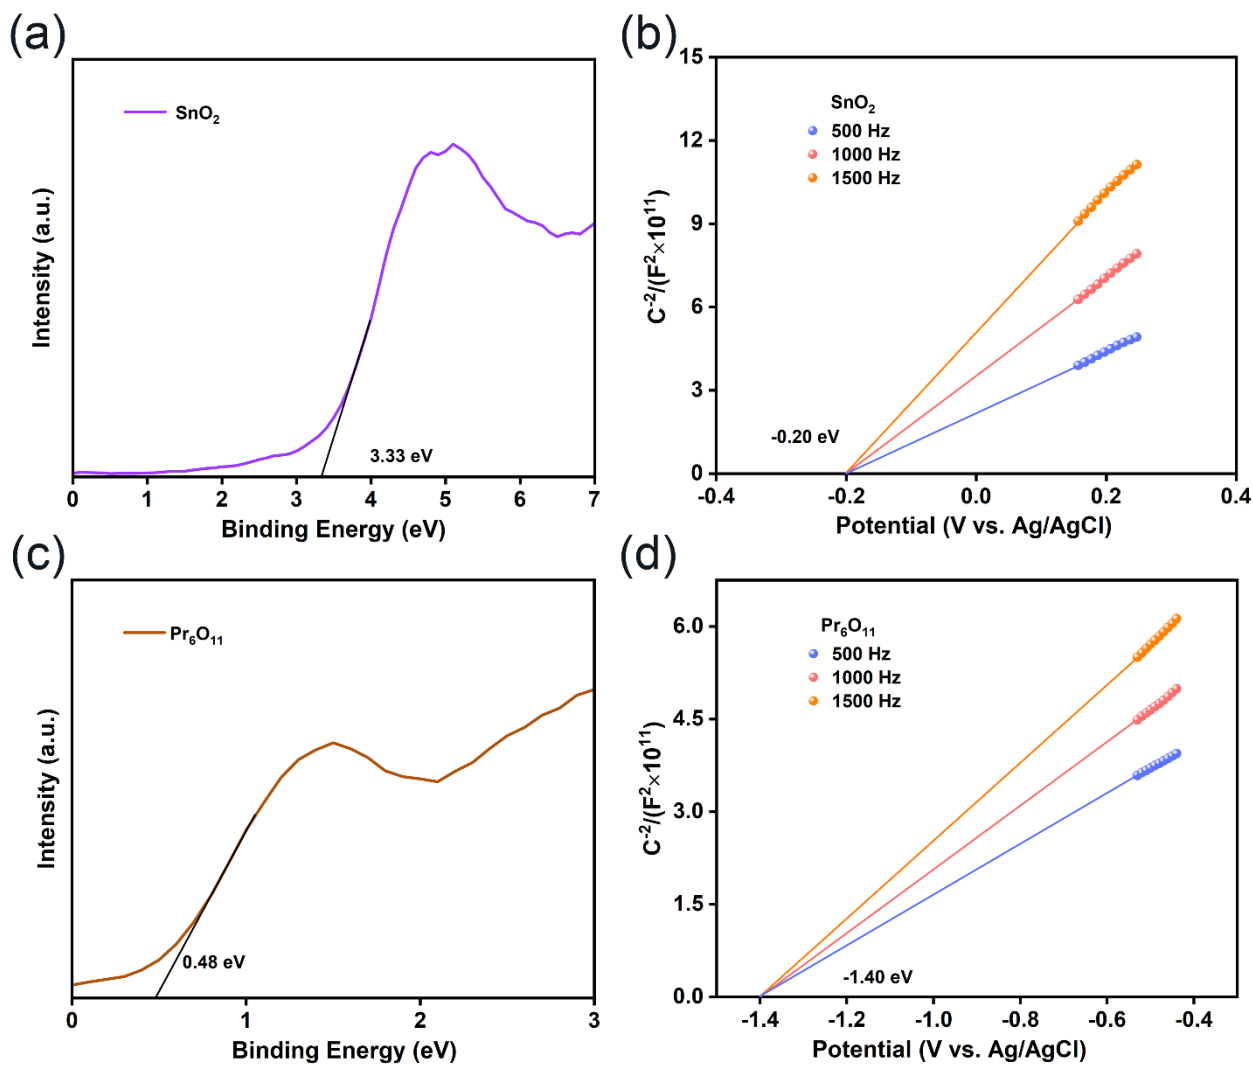

**Fig. S7** (a) VB-XPS spectrum of SnO<sub>2</sub>; (b) Mott-Schottky plot of SnO<sub>2</sub>; (c) VB-XPS spectrum of Pr<sub>6</sub>O<sub>11</sub>; (d) Mott-Schottky plot of Pr<sub>6</sub>O<sub>11</sub>.

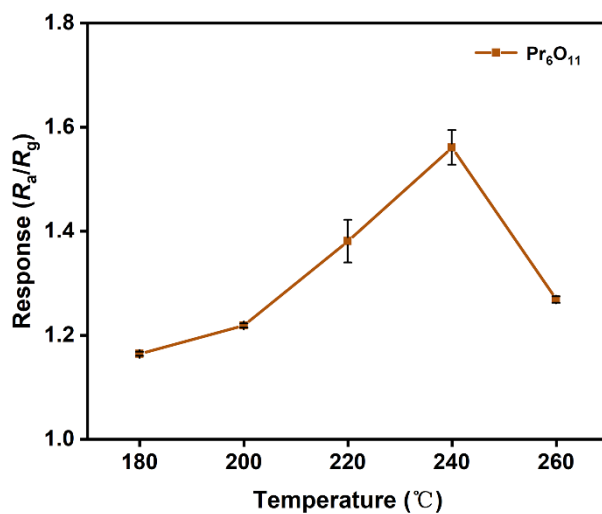

**Fig. S8** The response curve of Pr<sub>6</sub>O<sub>11</sub> to 100 ppm *n*-butanol at different temperatures.

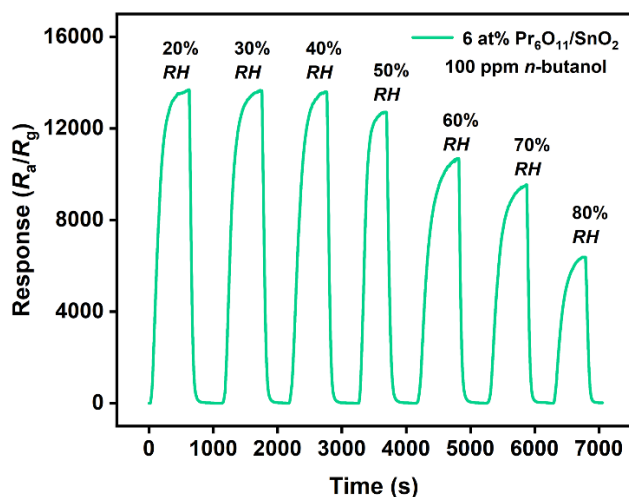

**Fig. S9** The real-time response curve of 100 ppm *n*-butanol at different relative humidity at 220 °C.

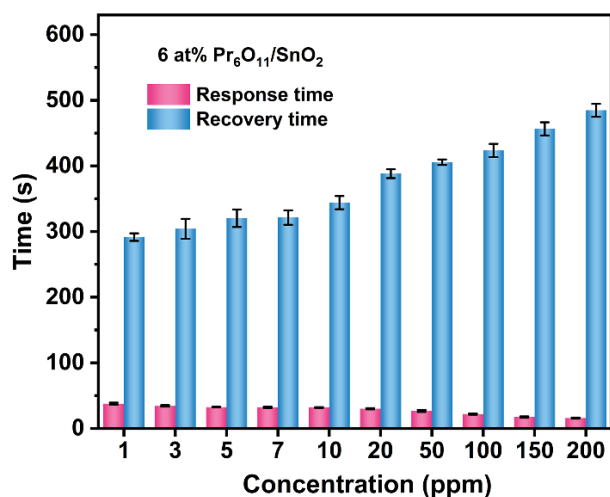

**Fig. S10** The response and recovery times of 6 at%  $\text{Pr}_6\text{O}_{11}/\text{SnO}_2$  sensors to different concentrations of *n*-butanol.

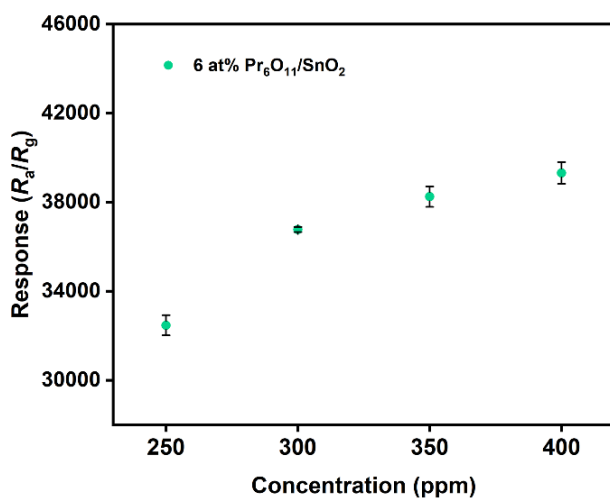

**Fig. S11** The response curve of 6 at%  $\text{Pr}_6\text{O}_{11}/\text{SnO}_2$  sensor to 250-400 ppm *n*-butanol gas.

**Table S4.** Calculation results of theoretical detection limits for SnO<sub>2</sub> and Pr<sub>6</sub>O<sub>11</sub>/SnO<sub>2</sub> composite materials.

| Time (s)         | SnO <sub>2</sub> |               | 3 at% Pr <sub>6</sub> O <sub>11</sub> /SnO <sub>2</sub> |               | 6 at% Pr <sub>6</sub> O <sub>11</sub> /SnO <sub>2</sub> |               | 9 at% Pr <sub>6</sub> O <sub>11</sub> /SnO <sub>2</sub> |               |
|------------------|------------------|---------------|---------------------------------------------------------|---------------|---------------------------------------------------------|---------------|---------------------------------------------------------|---------------|
|                  | $Y_i - Y$        | $(Y_i - Y)^2$ | $Y_i - Y$                                               | $(Y_i - Y)^2$ | $Y_i - Y$                                               | $(Y_i - Y)^2$ | $Y_i - Y$                                               | $(Y_i - Y)^2$ |
| 1                | -0.00545         | 2.97E-5       | 0.00229                                                 | 5.25E-6       | 0.00374                                                 | 1.40E-5       | -0.00505                                                | 2.55E-5       |
| 19               | 0.00436          | 1.90E-5       | -0.00311                                                | 9.66E-6       | -0.00507                                                | 2.57E-5       | -0.00390                                                | 1.52E-5       |
| 39               | 0.00436          | 1.90E-5       | 0.00049                                                 | 2.40E-7       | 0.00079                                                 | 6.24E-7       | 0.00305                                                 | 9.29E-6       |
| 59               | -0.00218         | 4.75E-6       | -0.00670                                                | 4.49E-5       | 0.00079                                                 | 6.24E-7       | 0.00770                                                 | 5.93E-5       |
| 79               | -0.00001         | 1.00E-10      | 0.00409                                                 | 1.68E-5       | 0.00671                                                 | 4.50E-5       | 0.00189                                                 | 3.56E-6       |
| 99               | 0.00108          | 1.17E-6       | 0.00049                                                 | 2.40E-7       | -0.00507                                                | 2.57E-5       | 0.00189                                                 | 3.56E-6       |
| 119              | -0.00328         | 1.08E-5       | -0.00311                                                | 9.66E-6       | -0.00215                                                | 4.61E-6       | -0.00736                                                | 5.42E-5       |
| 139              | 0.00327          | 1.07E-5       | 0.00409                                                 | 1.68E-5       | -0.00215                                                | 4.61E-6       | -0.00390                                                | 1.52E-5       |
| 159              | -0.00110         | 1.21E-6       | 0.00229                                                 | 5.25E-6       | 0.00374                                                 | 1.40E-5       | 0.00654                                                 | 4.27E-5       |
| 179              | -0.00437         | 1.91E-5       | -0.00311                                                | 9.66E-6       | 0.00079                                                 | 6.24E-7       | 0.00305                                                 | 9.29E-6       |
| 199              | 0.00327          | 1.07E-5       | 0.00229                                                 | 5.25E-6       | -0.00215                                                | 4.61E-6       | -0.00390                                                | 1.52E-5       |
| $\delta$         | 2.886            |               | 29.97                                                   |               | 130.1                                                   |               | 86.31                                                   |               |
| <i>LOD</i> (ppb) | 3.690            |               | 0.3524                                                  |               | 0.08624                                                 |               | 0.1748                                                  |               |

$$RMS = \sqrt{\frac{\sum(Y_i - Y)^2}{N - 1}} \dots\dots\dots(S6)$$

$$LOD(ppb) = \frac{3RMS}{\delta} \times 1000 \dots\dots\dots(S7)$$

In the equation,  $Y_i$  denotes the actual response at the baseline,  $N$  represents the number of

sampling points on the baseline,  $Y$  is the average response of the  $N$  measurement points, and  $\delta$  refers to the sensor sensitivity.

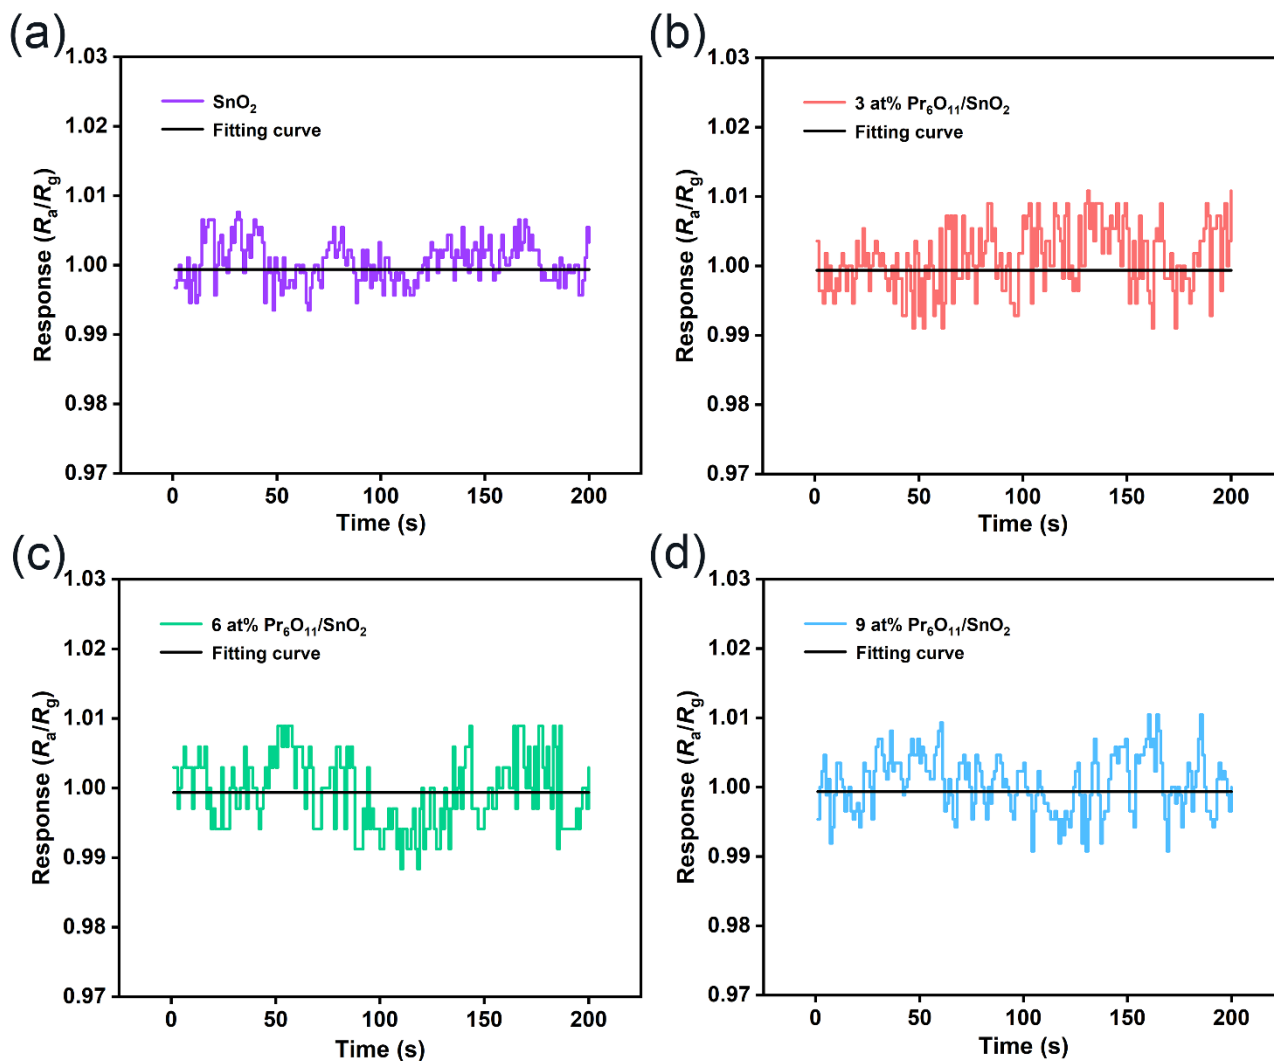

**Fig. S12** Baseline of four sensors exposed to *n*-butanol gas: (a) SnO<sub>2</sub>; (b) 3 at% Pr<sub>6</sub>O<sub>11</sub>/SnO<sub>2</sub>; (c) 6 at% Pr<sub>6</sub>O<sub>11</sub>/SnO<sub>2</sub>; (d) 9 at% Pr<sub>6</sub>O<sub>11</sub>/SnO<sub>2</sub>.
